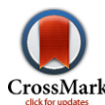

## Correction

# Correction: Targeting the Biophysical Properties of the Myeloma Initiating Cell Niches: A Pharmaceutical Synergism Analysis Using Multi-Scale Agent-Based Modeling

The *PLOS ONE* Staff

## Notice of Republication

This article was republished on October 17, 2014 to include the supporting information files, which were omitted in the original version. Please download this article again to view the correct version. The originally published, uncorrected article and the republished, corrected article are provided here for reference.

## Supporting Information

**File S1.** Originally published, uncorrected article.  
(PDF)

**File S2.** Republished corrected article.  
(PDF)

## Reference

1. Su J, Zhang L, Zhang W, Choi DS, Wen J, et al. (2014) Targeting the Biophysical Properties of the Myeloma Initiating Cell Niches: A Pharmaceutical Synergism Analysis Using Multi-Scale Agent-Based Modeling. *PLoS ONE* 9(1): e85059. doi:10.1371/journal.pone.0085059

---

**Citation:** The *PLOS ONE* Staff (2014) Correction: Targeting the Biophysical Properties of the Myeloma Initiating Cell Niches: A Pharmaceutical Synergism Analysis Using Multi-Scale Agent-Based Modeling. *PLoS ONE* 9(10): e112421. doi:10.1371/journal.pone.0112421

**Published:** October 28, 2014

**Copyright:** © 2014 The *PLOS ONE* Staff. This is an open-access article distributed under the terms of the Creative Commons Attribution License, which permits unrestricted use, distribution, and reproduction in any medium, provided the original author and source are credited.
